# Supplementary material for: Hybridization in Canids—A Case Study of Pampas Fox (Lycalopex gymnocercus) and Domestic Dog (Canis lupus familiaris) Hybrid
Source: MDPI journal article supplement (doi:10.3390/ani13152505), 2023-08-03
Supplement: s1 [file s1]

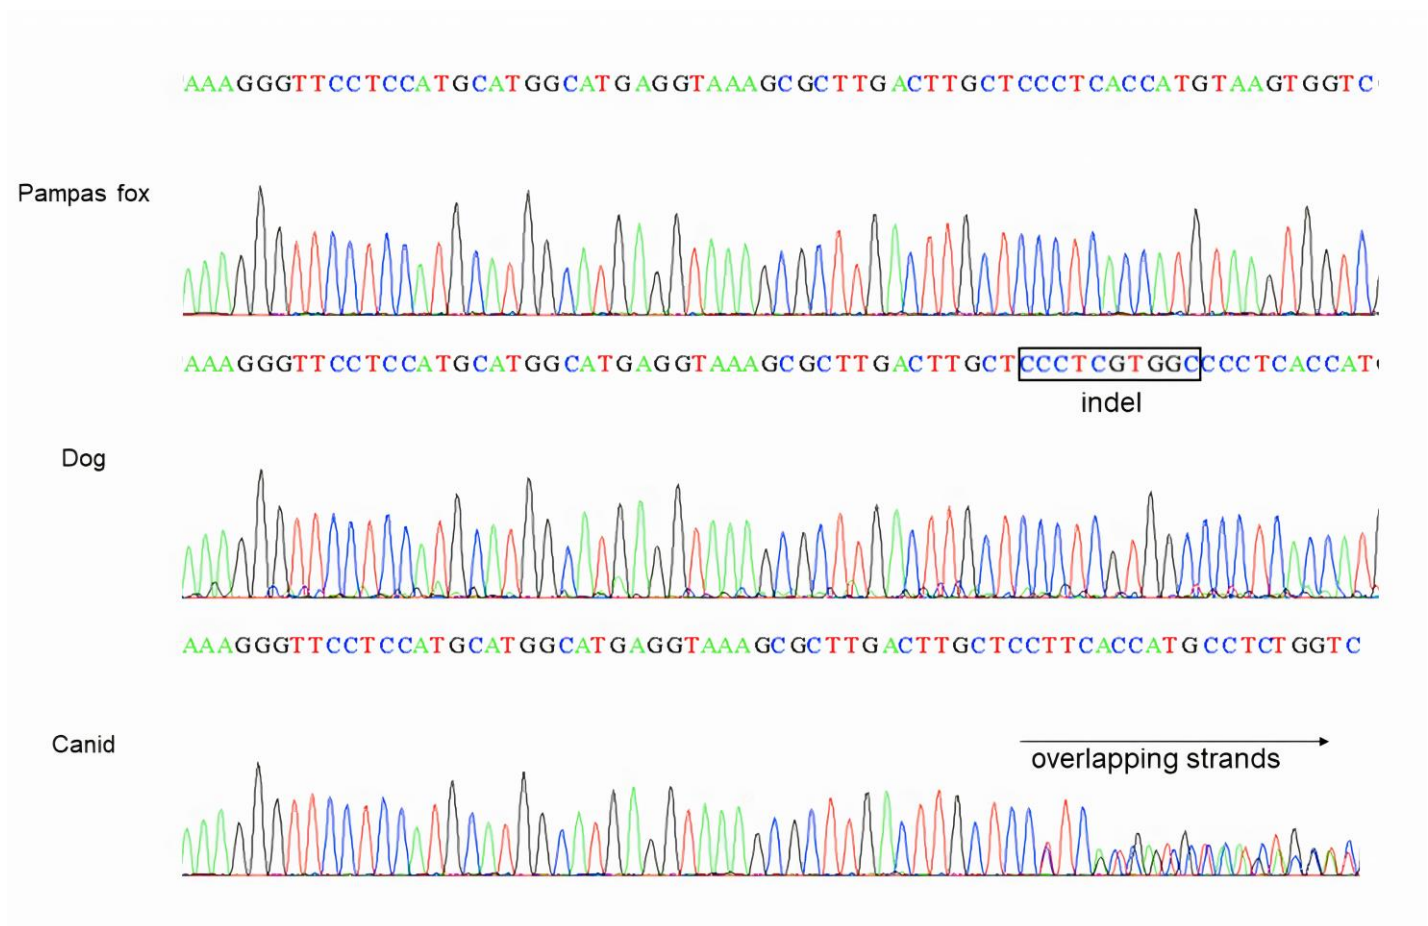

**Figure S1.** Sequencing of the FES segment in the pampas fox (*Lycalopex gymnocercus*), the dog (*Canis lupus familiaris*), and the canid.

**Table S1:** GenBank accession codes of sequences amplified in this study.

|                | APOB     | BDNF     | CHRNA1   | FES      | GHR      | COI      |
|----------------|----------|----------|----------|----------|----------|----------|
| Domestic dog 1 | OR268628 | OR294934 | OR294939 | OR287503 | OR282475 |          |
| Domestic dog 2 | OR268629 | OR294935 | OR294490 | OR287504 | OR282476 |          |
| Pampas fox 1   | -        | OR294936 | OR294941 | OR287505 | OR282477 |          |
| Pampas fox 2   | OR268630 | OR294937 | OR294942 | OR287506 | OR282478 |          |
| Canid          | OR268631 | OR294938 | OR294943 | OR287507 | OR282479 | OR283802 |

**Table S2:** GenBank sequences belonging to species of canids used in the alignment of FES to compare the presence or absence of the 10 bp segment.

|    | Species                         | GenBank accession code | Presence of 10 bp |
|----|---------------------------------|------------------------|-------------------|
| 1  | <i>Canis lupus familiaris</i>   | GU931096               | Presence of 10 bp |
|    |                                 | AY885362               | Presence of 10 bp |
|    |                                 | EU871598               | Presence of 10 bp |
|    |                                 | DQ205795               | Presence of 10 bp |
| 2  | <i>Canis simensis</i>           | DQ239455               | Presence of 10 bp |
| 3  | <i>Canis adustus</i>            | AY885357               | Presence of 10 bp |
| 4  | <i>Canis mesomelas</i>          | AY885363               | Presence of 10 bp |
| 5  | <i>Canis aureus</i>             | AY885359               | Presence of 10 bp |
| 6  | <i>Canis latrans</i>            | AY885361               | Presence of 10 bp |
| 7  | <i>Cerdocyon thous</i>          | EF107040               | Presence of 10 bp |
|    |                                 | EF107041               | Presence of 10 bp |
|    |                                 | EF107038               | Presence of 10 bp |
|    |                                 | EF107039               | Presence of 10 bp |
| 8  | <i>Lycaon pictus</i>            | AY885370               | Presence of 10 bp |
| 9  | <i>Speothos venaticus</i>       | AY885373               | Presence of 10 bp |
| 10 | <i>Alopex lagopus</i>           | DQ205796               | Presence of 10 bp |
|    |                                 | AY885355               | Presence of 10 bp |
| 11 | <i>Otocyon megalotis</i>        | AY885372               | Presence of 10 bp |
| 12 | <i>Chrysocyon brachyurus</i>    | AY885360               | Presence of 10 bp |
| 13 | <i>Atelocynus microtis</i>      | AY885356               | Presence of 10 bp |
| 14 | <i>Vulpes zerda</i>             | AY885369               | Presence of 10 bp |
| 15 | <i>Vulpes rueppellii</i>        | DQ239462               | Presence of 10 bp |
| 16 | <i>Vulpes cana</i>              | DQ239460               | Presence of 10 bp |
| 17 | <i>Vulpes macrotis</i>          | AY885376               | Presence of 10 bp |
| 18 | <i>Vulpes corsac</i>            | AY885375               | Presence of 10 bp |
| 19 | <i>Nyctereutes procyonoides</i> | GU931097               | Presence of 10 bp |
|    |                                 | AY885371               | Presence of 10 bp |
| 20 | <i>Cuon alpinus</i>             | AY885358               | Presence of 10 bp |
| 21 | <i>Urocyon littoralis</i>       | DQ239459               | Presence of 10 bp |
| 22 | <i>Urocyon cinereoargenteus</i> | GU931098               | Presence of 10 bp |
|    |                                 | AY885374               | Presence of 10 bp |
| 23 | <i>Lycalopex vetulus</i>        | DQ239458               | Presence of 10 bp |
| 24 | <i>Lycalopex shecurae</i>       | AY885368               | Presence of 10 bp |
| 25 | <i>Lycalopex culpaeus</i>       | DQ239456               | Absence of 10 bp  |
|    |                                 | OM169113               | Presence of 10 bp |
| 26 | <i>Lycalopex fulvipes</i>       | DQ239457               | Absence of 10 bp  |
| 27 | <i>Lycalopex griseus</i>        | AY885366               | Absence of 10 bp  |
|    |                                 | OM169104               | Absence of 10 bp  |
|    |                                 | OM169109               | Absence of 10 bp  |

|  |  |          |                  |
|--|--|----------|------------------|
|  |  | OM169106 | Absence of 10 bp |
|  |  | OM169111 | Absence of 10 bp |
|  |  | OM169107 | Absence of 10 bp |
|  |  | OM169112 | Absence of 10 bp |
|  |  | OM169108 | Absence of 10 bp |
|  |  | OM169110 | Absence of 10 bp |
|  |  | OM169103 | Absence of 10 bp |
|  |  | OM169105 | Absence of 10 bp |
